# Supplementary material
Source: Springer Nature journal article supplement (https://www.springermedizin.de/resource/supplementary/40478_2014_122_MOESM5_ESM.pdf/25658200)

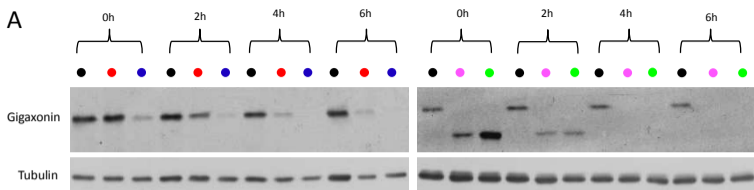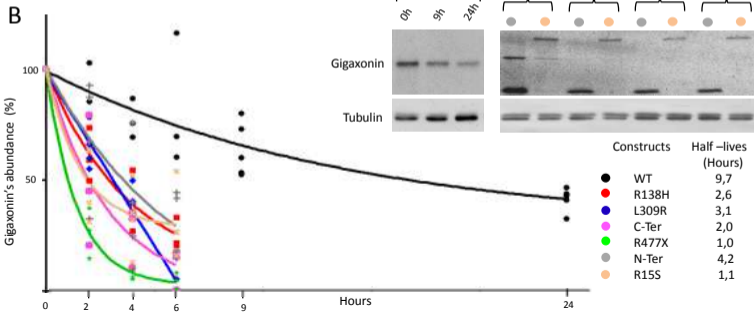

Supplement: MOESM5 [file 25658200]
